# Supplementary material for: Fabrication of AS1411 aptamer functionalized Gd2O3-based molecular magnetic resonance imaging (mMRI) nanoprobe for renal carcinoma cell imaging
Source: Royal Society of Chemistry journal article supplement (doi:10.1039/c5ra17211j), 2015-01-01
Supplement: c5ra17211j1.pdf [file c5ra17211j1.pdf]

## Supporting Information

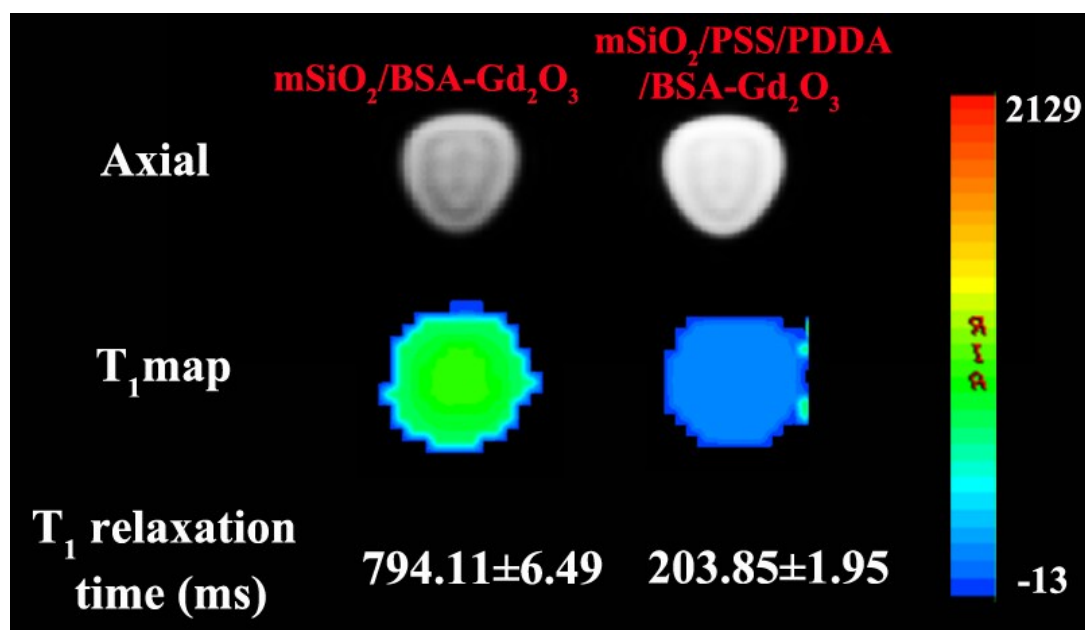

**Figure S1.** T<sub>1</sub>-weighted MR images and T<sub>1</sub>map images of mSiO<sub>2</sub>/BSA-Gd<sub>2</sub>O<sub>3</sub> and mSiO<sub>2</sub>/PSS/PDDA/BSA-Gd<sub>2</sub>O<sub>3</sub> nanocomplex.

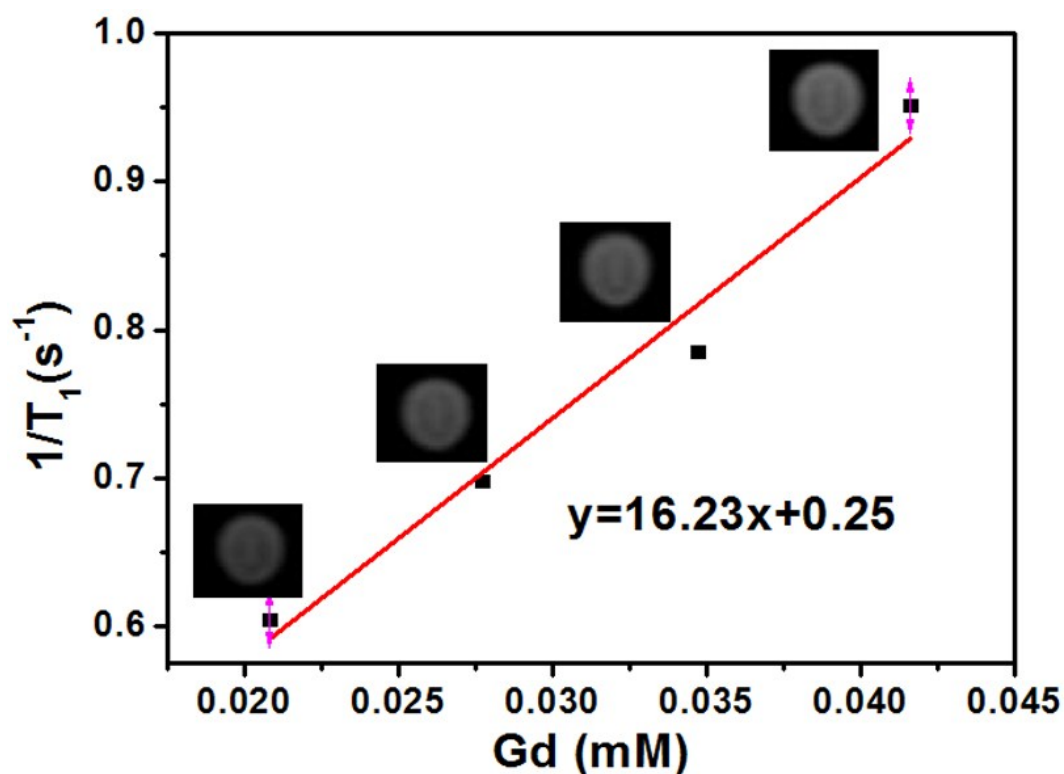

**Figure S2.** r<sub>1</sub> relaxivity curve and T<sub>1</sub>-weight MR images of mSiO<sub>2</sub>/BSA-Gd<sub>2</sub>O<sub>3</sub> with various Gd concentrations.
